# Supplementary material
Source: ML conference proceedings conference paper supplement (https://proceedings.mlr.press/v139/xu21h.html)
Supplement: Supplementary file 2 [file xu21h-supp.zip]

Archive with 22 entries (20 files):
- supp/
- __MACOSX/._supp
- supp/.DS_Store
- __MACOSX/supp/._.DS_Store
- supp/supplement.pdf
- __MACOSX/supp/._supplement.pdf
- supp/Code+Data/
- __MACOSX/supp/._Code+Data
- supp/Code+Data/ICML_EnbPI_helpers.py
- __MACOSX/supp/Code+Data/._ICML_EnbPI_helpers.py
- supp/Code+Data/ICML_ECAD_helpers.py
- __MACOSX/supp/Code+Data/._ICML_ECAD_helpers.py
- supp/Code+Data/ICML_EnbPI_Test.py
- __MACOSX/supp/Code+Data/._ICML_EnbPI_Test.py
- supp/Code+Data/ICML_ECAD_class.py
- __MACOSX/supp/Code+Data/._ICML_ECAD_class.py
- supp/Code+Data/Data.zip
- __MACOSX/supp/Code+Data/._Data.zip
- supp/Code+Data/ICML_ECAD_Test.py
- __MACOSX/supp/Code+Data/._ICML_ECAD_Test.py
- supp/Code+Data/ICML_EnbPI_Class.py
- __MACOSX/supp/Code+Data/._ICML_EnbPI_Class.py
