# Supplementary material
Source: ML conference proceedings conference paper supplement (https://proceedings.mlr.press/v139/xu21h.html)
Supplement: Supplementary file 2 [file xu21h-supp.zip › supp/Code+Data/ICML_EnbPI_Class.py]

import importlib
import warnings
from ICML_EnbPI_helpers import generate_bootstrap_samples, strided_app, weighted_quantile, beta_percentile
import matplotlib.pyplot as plt
import statsmodels.api as sm
from sklearn.linear_model import LogisticRegression
import numpy as np
import pandas as pd
import time as time
import os
import keras
from keras.models import Sequential
from keras.layers import Dense
from keras.layers import Dropout
from keras.optimizers import Adam
import sys
warnings.filterwarnings("ignore")


class prediction_interval():
    '''
        Create prediction intervals using different methods (Ensemble, LOO, ICP, weighted...)
    '''

    def __init__(self, fit_func, X_train, X_predict, Y_train, Y_predict):
        '''
            Fit_func: ridge, lasso, linear model, data
        '''
        self.regressor = fit_func
        self.X_train = X_train
        self.X_predict = X_predict
        self.Y_train = Y_train
        self.Y_predict = Y_predict
        # it will be updated with a list of bootstrap models, fitted on subsets of training data
        self.Ensemble_fitted_func = []
        # it will store residuals e_1, e_2,... from Ensemble
        self.Ensemble_online_resid = np.array([])
        self.ICP_fitted_func = []  # it only store 1 fitted ICP func.
        # it will store residuals e_1, e_2,... from ICP
        self.ICP_online_resid = np.array([])
        self.WeightCP_online_resid = np.array([])
    '''
        Algorithm: Ensemble (online)
            Main difference from earlier is
            1. We need to store these bootstrap estimators f^b
            2. when aggregating these stored f^b to make prediction on future points,
            do not aggregate all of them but randomly select B*~Binom(B,e^-1 ~= (1-1/k)^k) many f^b
            3. the residuals grow in length, so that a new point uses all previous residuals to create intervals
            (Thus intervals only get wider, not shorter)
    '''

    def fit_bootstrap_models_online(self, alpha, B, miss_test_idx):
        '''
          Train B bootstrap estimators from subsets of (X_train, Y_train) and calculate predictions on original data X_train
          Return 1-\alpha quantile of each prdiction on self.X_predict, also
          1. update self.Ensemble_fitted_func with bootstrap estimators and
          2. update self.Ensemble_online_resid with LOO online residuals (from training)
          Update:
           Include tilt option (only difference is using a different test data, so just chaneg name from predict to predict_tilt)
        '''
        n = len(self.X_train)
        n1 = len(self.X_predict)
        # hold indices of training data for each f^b
        boot_samples_idx = generate_bootstrap_samples(n, n, B)
        # hold predictions from each f^b
        boot_predictions = np.zeros((B, (n+n1)), dtype=float)
        # for i^th column, it shows which f^b uses i in training (so exclude in aggregation)
        in_boot_sample = np.zeros((B, n), dtype=bool)
        out_sample_predict = np.zeros((n, n1))
        ind_q = int((1-alpha)*n)
        for b in range(B):
            model = self.regressor
            if self.regressor.__class__.__name__ == 'Sequential':
                callback = keras.callbacks.EarlyStopping(monitor='loss', patience=10)
                if self.regressor.name == 'NeuralNet':
                    model.fit(self.X_train[boot_samples_idx[b], :], self.Y_train[boot_samples_idx[b], ],
                              epochs=1000, batch_size=100, callbacks=[callback], verbose=0)
                else:
                    # This is RNN, mainly have different shape and decrease epochs
                    model.fit(self.X_train[boot_samples_idx[b], :], self.Y_train[boot_samples_idx[b], ],
                              epochs=100, batch_size=100, callbacks=[callback], verbose=0)
            else:
                model = model.fit(self.X_train[boot_samples_idx[b], :],
                                  self.Y_train[boot_samples_idx[b], ])
            boot_predictions[b] = model.predict(np.r_[self.X_train, self.X_predict]).flatten()
            self.Ensemble_fitted_func.append(model)
            in_boot_sample[b, boot_samples_idx[b]] = True
        for i in range(n):
            b_keep = np.argwhere(~(in_boot_sample[:, i])).reshape(-1)
            if(len(b_keep) > 0):
                resid_LOO = np.abs(self.Y_train[i] - boot_predictions[b_keep, i].mean())
                self.Ensemble_online_resid = np.append(self.Ensemble_online_resid, resid_LOO)
                out_sample_predict[i] = boot_predictions[b_keep, n:].mean(0)
            else:  # if aggregating an empty set of models, predict zero everywhere
                resid_LOO = np.abs(self.Y_train[i])
                self.Ensemble_online_resid = np.append(self.Ensemble_online_resid, resid_LOO)
                out_sample_predict[i] = np.zeros(n1)
        sorted_out_sample_predict = np.sort(out_sample_predict, axis=0)[ind_q]  # length n1
        # TODO: Change this, because ONLY minus the non-missing predictions
        # However, need to make sure same length is maintained, o/w sliding cause problem
        resid_out_sample = np.abs(sorted_out_sample_predict-self.Y_predict)
        if len(miss_test_idx) > 0:
            # Replace missing residuals with that from the immediate predecessor that is not missing
            for l in range(len(miss_test_idx)):
                i = miss_test_idx[l]
                if i > 0:
                    j = i-1
                    while j in miss_test_idx[:l]:
                        j -= 1
                    resid_out_sample[i] = resid_out_sample[j]

                else:
                    # The first Y during testing is missing, let it be the last of the training residuals
                    # note, training data already takes out missing values, so doing is is fine
                    resid_out_sample[0] = self.Ensemble_online_resid[-1]
        self.Ensemble_online_resid = np.append(self.Ensemble_online_resid, resid_out_sample)
        return(sorted_out_sample_predict)

    def compute_PIs_Ensemble_online(self, alpha, B, stride, miss_test_idx, density_est=False):
        '''
            Note, this is not online version, so all test points have the same width
        '''
        n = len(self.X_train)
        n1 = len(self.Y_predict)
        # Now f^b and LOO residuals have been constructed from earlier
        out_sample_predict = self.fit_bootstrap_models_online(
            alpha, B, miss_test_idx)  # length of n1
        ind_q = int(100*(1-alpha))
        # start = time.time()
        if density_est:
            blocks = int(n1/stride)
            ind_q = np.zeros(blocks)
            p_vals = self.Ensemble_online_resid[:n]  # This will be changing
            p_vals = np.array([np.sum(i > p_vals)/len(p_vals) for i in p_vals])
            # Fill in first (block) of estimated quantiles:
            ind_q[0] = 100*beta_percentile(p_vals, alpha)
            # Fill in consecutive blocks
            for block in range(blocks-1):
                p_vals = p_vals[stride:]
                new_p_vals = self.Ensemble_online_resid[n+block*stride:n+(block+1)*stride]
                new_p_vals = np.array([np.sum(i > new_p_vals)/len(new_p_vals) for i in new_p_vals])
                p_vals = np.hstack((p_vals, new_p_vals))
                ind_q[block+1] = 100*beta_percentile(p_vals, alpha)
            ind_q = ind_q.astype(int)
            width = np.zeros(blocks)
            strided_resid = strided_app(self.Ensemble_online_resid[:-1], n, stride)
            for i in range(blocks):
                width[i] = np.percentile(strided_resid[i], ind_q[i], axis=-1)
        else:
            width = np.percentile(strided_app(
                self.Ensemble_online_resid[:-1], n, stride), ind_q, axis=-1)
        width = np.abs(np.repeat(width, stride))  # This is because |width|=T/stride.
        PIs_Ensemble = pd.DataFrame(np.c_[out_sample_predict-width,
                                          out_sample_predict+width], columns=['lower', 'upper'])
        # print(time.time()-start)
        return PIs_Ensemble
    '''
        Inductive Conformal Prediction (online)
    '''

    def compute_PIs_ICP_online(self, alpha, l, density_est):
        '''Basic idea: Randomly subsample l data from X, fit a model on X, calculate residuals on all but the l data in (X,Y),
           and finally compute the CI using the quantiles
           Main difference from offline version:
            We also update the length of residuals so the interval widths only grow
           '''
        n = len(self.X_train)
        proper_train = np.random.choice(n, l, replace=False)
        X_train = self.X_train[proper_train, :]
        Y_train = self.Y_train[proper_train]
        X_calibrate = np.delete(self.X_train, proper_train, axis=0)
        Y_calibrate = np.delete(self.Y_train, proper_train)
        model = self.regressor
        if self.regressor.__class__.__name__ == 'Sequential':
            callback = keras.callbacks.EarlyStopping(monitor='loss', patience=10)
            if self.regressor.name == 'NeuralNet':
                model.fit(self.X_train, self.Y_train,
                          epochs=1000, batch_size=100, callbacks=[callback], verbose=0)
            else:
                # This is RNN, mainly have different epochs
                model.fit(X_train, Y_train,
                          epochs=100, batch_size=100, callbacks=[callback], verbose=0)
            callback = keras.callbacks.EarlyStopping(monitor='loss', patience=10)
            model.fit(X_train, Y_train,
                      epochs=1000, batch_size=100, callbacks=[callback], verbose=0)
            self.ICP_fitted_func.append(model)
        else:
            self.ICP_fitted_func.append(self.regressor.fit(X_train, Y_train))
        predictions_calibrate = self.ICP_fitted_func[0].predict(X_calibrate).flatten()
        calibrate_residuals = np.abs(Y_calibrate-predictions_calibrate)
        out_sample_predict = self.ICP_fitted_func[0].predict(self.X_predict).flatten()
        self.ICP_online_resid = np.append(
            self.ICP_online_resid, calibrate_residuals)  # length n-l
        ind_q = int(100*(1-alpha))  # 1-alpha%
        width = np.abs(np.percentile(self.ICP_online_resid, ind_q, axis=-1).T)
        # print(np.min(width))
        # # Note, Below is for online sliding, but I reverted these back so doing so is unnecessary
        # predict_residuals = np.abs(self.Y_predict-out_sample_predict)
        # self.ICP_online_resid = np.append(self.ICP_online_resid, predict_residuals)  # length n1
        # ind_q = int(100*(1-alpha))  # 1-alpha%
        # # start = time.time()
        # if density_est:
        #     n1 = len(self.Y_predict)
        #     blocks = int(n1/stride)
        #     ind_q = np.zeros(blocks)
        #     p_vals = self.ICP_online_resid[:n-l]  # This will be changing
        #     p_vals = np.array([np.sum(i > p_vals)/len(p_vals) for i in p_vals])
        #     # Fill in first (block) of estimated quantiles:
        #     ind_q[0] = 100*beta_percentile(p_vals, alpha)
        #     # Fill in consecutive blocks
        #     for block in range(blocks-1):
        #         p_vals = p_vals[stride:]
        #         new_p_vals = self.ICP_online_resid[n+block*stride:n+(block+1)*stride]
        #         new_p_vals = np.array([np.sum(i > new_p_vals)/len(new_p_vals) for i in new_p_vals])
        #         p_vals = np.hstack((p_vals, new_p_vals))
        #         ind_q[block+1] = 100*beta_percentile(p_vals, alpha)
        #     ind_q = ind_q.astype(int)
        #     width = np.zeros(blocks)
        #     strided_resid = strided_app(self.ICP_online_resid[:-1], n-l, stride)
        #     for i in range(blocks):
        #         width[i] = np.percentile(strided_resid[i], ind_q[i], axis=-1)
        # else:
        #     width = np.percentile(strided_app(
        #         self.ICP_online_resid[:-1], n-l, stride), ind_q, axis=-1).T
        # width = np.repeat(width, stride)
        PIs_ICP = pd.DataFrame(np.c_[out_sample_predict-width,
                                     out_sample_predict+width], columns=['lower', 'upper'])
        # print(time.time()-start)
        return PIs_ICP

    '''
        Weighted Conformal Prediction
    '''

    def compute_PIs_Weighted_ICP_online(self, alpha, l, density_est):
        '''Basic idea: Randomly subsample l data from X, fit a model on X, calculate residuals on all but the l data in (X,Y),
           and finally compute the CI using the quantiles
           Caveat: the residuals are weighted by fitting a logistic regression on
           (X_calibrate, C=0) \cup (X_predict, C=1
           Main difference from offline version:
            We also update the length of residuals so the interval widths only grow
           '''
        n = len(self.X_train)
        n1 = len(self.X_predict)
        proper_train = np.random.choice(n, l, replace=False)
        X_train = self.X_train[proper_train, :]
        Y_train = self.Y_train[proper_train]
        X_calibrate = np.delete(self.X_train, proper_train, axis=0)
        Y_calibrate = np.delete(self.Y_train, proper_train)
        # Main difference from ICP
        C_calibrate = np.zeros(n-l)
        C_predict = np.ones(n1)
        X_weight = np.r_[X_calibrate, self.X_predict]
        C_weight = np.r_[C_calibrate, C_predict]
        if len(X_weight.shape) > 2:
            # Reshape for RNN
            tot, _, shap = X_weight.shape
            X_weight = X_weight.reshape((tot, shap))
        clf = LogisticRegression(random_state=0).fit(X_weight, C_weight)
        Prob = clf.predict_proba(X_weight)
        Weights = Prob[:, 1]/(1-Prob[:, 0])  # n-l+n1 in length
        model = self.regressor
        if self.regressor.__class__.__name__ == 'Sequential':
            callback = keras.callbacks.EarlyStopping(monitor='loss', patience=10)
            if self.regressor.name == 'NeuralNet':
                model.fit(X_train, Y_train,
                          epochs=1000, batch_size=100, callbacks=[callback], verbose=0)
            else:
                # This is RNN, mainly have different epochs
                model.fit(X_train, Y_train,
                          epochs=100, batch_size=100, callbacks=[callback], verbose=0)
            self.ICP_fitted_func.append(model)
        else:
            self.ICP_fitted_func.append(self.regressor.fit(X_train, Y_train))
        predictions_calibrate = self.ICP_fitted_func[0].predict(X_calibrate).flatten()
        calibrate_residuals = np.abs(Y_calibrate-predictions_calibrate)
        out_sample_predict = self.ICP_fitted_func[0].predict(self.X_predict).flatten()
        self.WeightCP_online_resid = np.append(
            self.WeightCP_online_resid, calibrate_residuals)  # length n-1
        width = np.abs(weighted_quantile(values=self.WeightCP_online_resid, quantiles=1-alpha,
                                         sample_weight=Weights[:n-l]))
        # # Note, Below is for online sliding, but I reverted these back so doing so is unnecessary
        # predict_residuals = np.abs(self.Y_predict-out_sample_predict)
        # self.WeightCP_online_resid = np.append(
        #     self.WeightCP_online_resid, predict_residuals)  # length n1
        # # start = time.time()
        # strided_resids = strided_app(
        #     self.WeightCP_online_resid[:-1], n-l, stride)
        # strided_weights = strided_app(
        #     Weights[:-1], n-l, stride)
        # strided_resids = np.repeat(strided_resids, stride, axis=0)
        # strided_weights = np.repeat(strided_weights, stride, axis=0)
        # width = np.zeros(n1)
        # # TODO: This wightedICP not yet changed to density_est, because it has weights
        # for i in range(n1):
        #     width[i] = weighted_quantile(values=strided_resids[i, :], quantiles=1-alpha,
        #                                  sample_weight=strided_weights[i, :])
        PIs_ICP = pd.DataFrame(np.c_[out_sample_predict-width,
                                     out_sample_predict+width], columns=['lower', 'upper'])
        # print(time.time()-start)
        return PIs_ICP

    def compute_PIs_ARIMA_online(self, alpha):
        '''
            Fit ARIMA(10,1,10) to all models
            Use train_size to form model and the rest to be out-sample-prediction
            return PI (in class, train_size would just be len(self.Y_train), data would be
            pd.DataFrame(np.r[self.Y_train,self.Y_predict]))
            Note, need to import statsmodels.api as sm
        '''
        # Concatenate training and testing together
        data = pd.DataFrame(np.r_[self.Y_train, self.Y_predict])
        # Train model
        train_size = len(self.Y_train)
        training_mod = sm.tsa.statespace.SARIMAX(data[:train_size], order=(10, 1, 10))
        print('training')
        training_res = training_mod.fit(disp=0)
        print('training done')
        # Use in full model
        mod = sm.tsa.SARIMAX(data, order=(10, 1, 10))
        res = mod.filter(training_res.params)
        # Get the insample prediction interval (which is outsample prediction interval)
        pred = res.get_prediction(start=data.index[train_size], end=data.index[-1])
        pred_int = pred.conf_int(alpha=alpha)  # prediction interval
        PIs_ARIMA = pd.DataFrame(
            np.c_[pred_int.iloc[:, 0], pred_int.iloc[:, 1]], columns=['lower', 'upper'])
        return(PIs_ARIMA)

    '''
        All together
    '''

    def run_experiments(self, alpha, B, stride, data_name, itrial,  miss_test_idx, true_Y_predict=[], density_est=False, rho=10000, get_plots=False, none_CP=False, methods=['Ensemble', 'ICP', 'Weighted_ICP']):
        '''
            Note, it is assumed that real data has been loaded, so in actual execution,
            generate data before running this
            Default is for running real-data
            NOTE: I added a "true_Y_predict" option, which will be used for calibrating coverage under missing data
            In particular, this is needed when the Y_predict we use for training is NOT the same as true Y_predict
        '''
        train_size = len(self.X_train)
        np.random.seed(98765+itrial)
        if none_CP:
            if rho < 100:
                # Running COLT simulation
                results = pd.DataFrame(columns=['itrial', 'dataname',
                                                'method', 'rho', 'coverage', 'width'])
            else:
                # other
                results = pd.DataFrame(columns=['itrial', 'dataname',
                                                'method', 'train_size', 'coverage', 'width'])
            print('Not using Conformal Prediction Methods')
            print('Running ARIMA(10,1,10)')
            PI_ARIMA = self.compute_PIs_ARIMA_online(alpha)
            coverage_ARIMA = ((np.array(PI_ARIMA['lower']) <= self.Y_predict) & (
                np.array(PI_ARIMA['upper']) >= self.Y_predict)).mean()
            print(f'Average Coverage is {coverage_ARIMA}')
            width_ARIMA = (PI_ARIMA['upper'] - PI_ARIMA['lower']).mean()
            print(f'Average Width is {width_ARIMA}')
            results.loc[len(results)] = [itrial, data_name, 'ARIMA',
                                         train_size, coverage_ARIMA, width_ARIMA]

        else:
            if rho < 100:
                # Running COLT simulation
                results = pd.DataFrame(columns=['itrial', 'dataname', 'muh_fun',
                                                'method', 'rho', 'coverage', 'width'])
            else:
                # other
                results = pd.DataFrame(columns=['itrial', 'dataname', 'muh_fun',
                                                'method', 'train_size', 'coverage', 'width'])
            PIs = []
            for method in methods:
                print(f'Runnning {method}')
                if method == 'Ensemble':
                    PI = eval(f'compute_PIs_{method}_online({alpha},{B},{stride},{miss_test_idx},{density_est})',
                              globals(), {k: getattr(self, k) for k in dir(self)})
                else:
                    l = int(0.5*len(self.X_train))
                    PI = eval(f'compute_PIs_{method}_online({alpha},{l},{density_est})',
                              globals(), {k: getattr(self, k) for k in dir(self)})
                PIs.append(PI)
                coverage = ((np.array(PI['lower']) <= self.Y_predict) & (
                    np.array(PI['upper']) >= self.Y_predict)).mean()
                if len(true_Y_predict) > 0:
                    coverage = ((np.array(PI['lower']) <= true_Y_predict) & (
                        np.array(PI['upper']) >= true_Y_predict)).mean()
                print(f'Average Coverage is {coverage}')
                width = (PI['upper'] - PI['lower']).mean()
                print(f'Average Width is {width}')
                if rho < 100:
                    # Running COLT simulation
                    results.loc[len(results)] = [itrial, data_name,
                                                 self.regressor.__class__.__name__, method, rho, coverage, width]
                else:
                    results.loc[len(results)] = [itrial, data_name,
                                                 self.regressor.__class__.__name__, method, train_size, coverage, width]
        if get_plots:
            if none_CP:
                return([PI_ARIMA, results])
            else:
                PIs.append(results)
                '''Do 1,2,3 below with PIs_Ensemble and PI_ICP and (more) '''
                return(PIs)
        else:
            return(results)

    '''
        A. Making plots:
        (All need the prediction intervals, not just average coverage/width)
        Hence, use these as helpers for run_simulate/run_real_data for plotting
        1. Original series with confidence band
        2. Error rate (i.e. coverage vs. alpha (diagonal line as reference)). Fix a training size here
        3. Box plot: plot different intervals against their corresponding regressors
        B. Winkler score/other evaluation metrics (calculate such score as coverage/non-coverage are examined.)

        Note, for 2 & 3 they are written outside the class (in Algorithm.py), because thet take .csv files and make plots
    '''

    def series_vs_PI(self, PIs_ls, data_name, fit_func_name, one_dim=False):
        # names = {'RidgeCV': 'Ridge:', 'LassoCV': 'Lasso:',
        #          'RandomForestRegressor': "Random Forest:"}
        fig, ax = plt.subplots(nrows=1, ncols=2, figsize=(14, 5), sharey=True)
        n1 = len(self.Y_predict)
        axisfont = 20
        tickfont = 16
        plot_len = np.min([int(0.1*n1), 35])
        x_axis = np.arange(plot_len)  # just 0 to at most 35, it doesn't matter what x-axis is now
        ax[0].plot(x_axis, self.Y_predict[:plot_len],
                   color='black',  linestyle='dashed', label='Data', marker='o')
        ax[1].plot(x_axis, self.Y_predict[:plot_len],
                   color='black',  linestyle='dashed', label='Data', marker='o')
        color = ['blue', 'red', 'black']
        label_ls = ['Ensemble', 'ICP', 'Weighetd_ICP']
        for i in range(len(color)):
            # First multivariate, 0-2
            ax[0].plot(x_axis, PIs_ls[i]['lower'][:plot_len],
                       color=color[i], label=label_ls[i])
            ax[0].plot(x_axis, PIs_ls[i]['upper'][:plot_len], color=color[i])
            ax[0].set_xlabel('time', fontsize=axisfont)
            ax[0].tick_params(axis='both', which='major', labelsize=tickfont)
            # Then univariate, 3-5
            ax[1].plot(x_axis, PIs_ls[i+3]['lower'][:plot_len],
                       color=color[i], label=label_ls[i])
            ax[1].plot(x_axis, PIs_ls[i+3]['upper'][:plot_len], color=color[i])
            ax[1].set_xlabel('time', fontsize=axisfont)
            ax[1].tick_params(axis='both', which='major', labelsize=tickfont)
        ax[0].legend(fontsize=axisfont-2, loc='lower left')
        # ax.set_title(
        #     f'{names[fit_func_name]} Actual Time Series and Prediction Intervals', fontsize=axisfont)
        fig.tight_layout()
        # if one_dim:
        #     plt.savefig(f'{data_name}_band_around_actual_1d_{fit_func_name}.pdf', dpi=300, bbox_inches='tight',
        #                 pad_inches=0)
        # else:
        plt.savefig(f'{data_name}_band_around_actual_{fit_func_name}.pdf', dpi=300, bbox_inches='tight',
                    pad_inches=0)
        plt.show()

    def Winkler_score(self, PIs_ls, data_name, methods_name, alpha, none_CP=False):
        # Examine if each test point is in the intervals
        # If in, then score += width of intervals
        # If not,
        # If true y falls under lower end, score += width + 2*(lower end-true y)/alpha
        # If true y lies above upper end, score += width + 2*(true y-upper end)/alpha
        n1 = len(self.Y_predict)
        score_ls = []
        if none_CP:
            score = 0
            for j in range(n1):
                upper = PIs_ls.loc[j, 'upper']
                lower = PIs_ls.loc[j, 'lower']
                width = upper-lower
                truth = self.Y_predict[j]
                if (truth >= lower) & (truth <= upper):
                    score += width
                elif truth < lower:
                    score += width + 2 * (lower-truth)/alpha
                else:
                    score += width + 2 * (truth-upper)/alpha
            score_ls.append(score)
        else:
            for i in range(len(methods_name)):
                score = 0
                for j in range(n1):
                    upper = PIs_ls[i].loc[j, 'upper']
                    lower = PIs_ls[i].loc[j, 'lower']
                    width = upper-lower
                    truth = self.Y_predict[j]
                    if (truth >= lower) & (truth <= upper):
                        score += width
                    elif truth < lower:
                        score += width + 2 * (lower-truth)/alpha
                    else:
                        score += width + 2 * (truth-upper)/alpha
                score_ls.append(score)
        return(score_ls)
